# Supplementary material for: Influence of periodontal treatment on blood microbiotas: a clinical trial
Source: PeerJ journal article supplement (doi:10.7717/peerj.10846), 2021-02-16
Supplement: protocol2.pdf [file protocol2.pdf]

# 扩增子实验操作步骤

## 1. 基因组 DNA 提取

使用 PowerSoil DNA Isolation Kit(MoBio Laboratories, Carlsbad, CA)试剂盒提取基因组 DNA。

## 2. 基因组 DNA 质检

使用 Nanodrop 检验 DNA 质量和浓度。

## 3. PCR 扩增

按指定扩增区域，合成带有 barcode 的特异引物，或合成带有错位碱基的融合引物。使用 KAPA 2G Robust Hot Start Ready Mix 及相应引物进行 PCR 扩增(不同引物程序不同)。

PCR 扩增总体系为 25  $\mu$ L:

| 试剂成分                               | 体积             |
|------------------------------------|----------------|
| DNA 样品                             | X (30 ng)      |
| Forward Primer (5 $\mu$ M)         | 1 $\mu$ L      |
| Reverse Primer (5 $\mu$ M)         | 1 $\mu$ L      |
| KAPA 2G Robust Hot Start Ready Mix | 12.5 $\mu$ L   |
| ddH <sub>2</sub> O                 | 10.5-X $\mu$ L |
| Total                              | 25 $\mu$ L     |

反应程序:

| 温度   | 反应时间     | 反应循环数    |
|------|----------|----------|
| 95°C | 5 min    | -        |
| 95°C | 45 s     | 28 cycle |
| 55°C | 50 s     |          |
| 72°C | 45 s     |          |
| 72°C | 10 min   | -        |
| 4°C  | $\infty$ | -        |

#### 4. PCR 产物电泳检测

1%琼脂糖凝胶电泳检测扩增目的条带大小，170 V 30 min。

#### 5. PCR 产物纯化

PCR 产物使用磁珠法进行自动化纯化。

- (1) 磁珠室温平衡 30 min 后震荡混匀。取 18  $\mu$ L 磁珠于新的 96 孔板中。
- (2) 将 PCR 产物加入装有磁珠的 96 孔板中混匀，室温静置 5 min。
- (3) 将 96 孔板置于磁力架上静置，使磁珠充分沉降，吸取并弃去上清。
- (4) 用 200  $\mu$ L 80%乙醇吹打洗涤磁珠后，吸取并弃去酒精（此过程不要触碰到磁珠且不要将磁珠吹散，96 孔板不要离开磁力架）。
- (5) 继续用 200  $\mu$ L 80%乙醇洗涤，吸取并弃去酒精，将含有磁珠的 96 孔板置于 37°C 加热器上，烘干残余酒精。
- (6) 加入 27  $\mu$ L EB solution，反复吹打混匀，室温静置 5 min，置于磁力架上澄清 2 min，回收 25  $\mu$ L 于新的 96 孔板中。
- (7) 使用 Caliper 检测 PCR 产物浓度、片段大小。

#### 6. Miseq 文库构建

按照 Pooling 比例，对没有错位碱基的融合引物 PCR 产物取一定体积 Pooling 成一个上机文库，并使用 2%琼脂糖凝胶对文库片段进行筛选。筛选后的文库片段经 Qubit 检测定量，取一定量文库加入 10  $\mu$ L End repair & Add A 进行末端修复加 A 尾，再加入 33.5  $\mu$ L Adaptor Ligation Mix 连接测序接头，并对文库进行纯化回收。然后加入接头引物、酶及 Mix 进行 PCR 富集完成文库构建。

PCR 富集反应程序：

| 温度   | 反应时间     | 反应循环数   |
|------|----------|---------|
| 37°C | 15 min   | -       |
| 98°C | 30 s     | 5 cycle |
| 98°C | 10 s     |         |
| 65°C | 75 s     |         |
| 65°C | 5 min    | -       |
| 4°C  | $\infty$ | -       |

最后，构建完成的 **Miseq** 文库使用**磁珠法**进行纯化。

- (1) 磁珠室温平衡 30 min 后震荡混匀。取 40  $\mu$ L 磁珠于新的 1.5 mL EP 管中。
- (2) 将 PCR 产物加入装有磁珠的 EP 管中，吹打混匀，室温静置 4 min（每个都不得超过 4 min，防止吸附引物二聚体）。
- (3) 将 EP 管置于磁力架上静置，使磁珠充分沉降，吸取并弃去上清。
- (4) 用 200  $\mu$ L 80%乙醇吹打洗涤磁珠后，吸取并弃去酒精（此过程不要触碰到磁珠且不要将磁珠吹散，EP 管不要离开磁力架）。
- (5) 继续用 200  $\mu$ L 80%乙醇洗涤 2 遍，将含有磁珠的 EP 管置于 37°C 加热器上，烘干残余酒精。
- (6) 加入 27  $\mu$ L EB solution，反复吹打混匀，室温静置 4 min，置于磁力架上澄清 2 min，回收 26  $\mu$ L 于新的 EP 管中。

#### 7. **Miseq** 文库质检

使用 Nanodrop 粗检文库浓度，Agilent 2100 检测文库片段，**qPCR** 精确定量文库浓度。

#### 8. 上机测序

最后文库在 Illumina Miseq 平台上机测序。
