# Supplementary material for: Influence of periodontal treatment on blood microbiotas: a clinical trial
Source: PeerJ. 2021 Feb 16;9:e10846. doi: 10.7717/peerj.10846 (PMC7894104; doi:10.7717/peerj.10846)
Supplement: Supplemental Information 7 — Age data in three groups. [file peerj-09-10846-s007.xlsx]

## Sheet: Sheet1
Age
Group A		GroupB		GroupC
28		35		37
46		45		36
40		60		48
43		50		30
42		57		34
32		67		29
36		56		55
50		48		54
42		29		61
31		42		52
49		39		38
30		37		26
68
31
34
58
