# Supplementary material for: Influence of periodontal treatment on blood microbiotas: a clinical trial
Source: PeerJ. 2021 Feb 16;9:e10846. doi: 10.7717/peerj.10846 (PMC7894104; doi:10.7717/peerj.10846)
Supplement: Supplemental Information 8 — Data includes nested PCR; the brightness of gel strip represents the amount of total bacterial gene. [file peerj-09-10846-s008.xlsx]

## Sheet: Sheet1
项目名称/Project name	合同编号/Contract number	文库类型/Library type	Sample ID	Sample Name	order number
青岛市口腔医院86个血液DNA样本16SV3-V4区MiseqPE300测序分析ZWY	AWGT19101811	16S V3-V4	SD20191018218	Q43	19	A1a
青岛市口腔医院86个血液DNA样本16SV3-V4区MiseqPE300测序分析ZWY	AWGT19101811	16S V3-V4	SD20191018219	Q43B	20	A1b
青岛市口腔医院86个血液DNA样本16SV3-V4区MiseqPE300测序分析ZWY	AWGT19101811	16S V3-V4	SD20191018220	Q43c	21	A1c
青岛市口腔医院86个血液DNA样本16SV3-V4区MiseqPE300测序分析ZWY	AWGT19101811	16S V3-V4	SD20191018221	ZX	22	A2a
青岛市口腔医院86个血液DNA样本16SV3-V4区MiseqPE300测序分析ZWY	AWGT19101811	16S V3-V4	SD20191018222	Q40B	23	A2b
青岛市口腔医院86个血液DNA样本16SV3-V4区MiseqPE300测序分析ZWY	AWGT19101811	16S V3-V4	SD20191018223	Q40C	24	A2c
青岛市口腔医院86个血液DNA样本16SV3-V4区MiseqPE300测序分析ZWY	AWGT19101811	16S V3-V4	SD20191018224	Q57	25	A3a
青岛市口腔医院86个血液DNA样本16SV3-V4区MiseqPE300测序分析ZWY	AWGT19101811	16S V3-V4	SD20191018225	Q57B	26	A3b
青岛市口腔医院86个血液DNA样本16SV3-V4区MiseqPE300测序分析ZWY	AWGT19101811	16S V3-V4	SD20191018226	Q57C	27	A3c
青岛市口腔医院86个血液DNA样本16SV3-V4区MiseqPE300测序分析ZWY	AWGT19101811	16S V3-V4	SD20191018227	Q61	28	A4a
青岛市口腔医院86个血液DNA样本16SV3-V4区MiseqPE300测序分析ZWY	AWGT19101811	16S V3-V4	SD20191018228	Q61B	29	A4b
青岛市口腔医院86个血液DNA样本16SV3-V4区MiseqPE300测序分析ZWY	AWGT19101811	16S V3-V4	SD20191018229	Q61C	30	A4c
青岛市口腔医院86个血液DNA样本16SV3-V4区MiseqPE300测序分析ZWY	AWGT19101811	16S V3-V4	SD20191018230	Q55	31	A5a
青岛市口腔医院86个血液DNA样本16SV3-V4区MiseqPE300测序分析ZWY	AWGT19101811	16S V3-V4	SD20191018231	Q55B	32	A5b
青岛市口腔医院86个血液DNA样本16SV3-V4区MiseqPE300测序分析ZWY	AWGT19101811	16S V3-V4	SD20191018232	Q55c	33	A5c
青岛市口腔医院86个血液DNA样本16SV3-V4区MiseqPE300测序分析ZWY	AWGT19101811	16S V3-V4	SD20191018233	Q69	34	A6a
青岛市口腔医院86个血液DNA样本16SV3-V4区MiseqPE300测序分析ZWY	AWGT19101811	16S V3-V4	SD20191018234	Q69B	35	A6b
青岛市口腔医院86个血液DNA样本16SV3-V4区MiseqPE300测序分析ZWY	AWGT19101811	16S V3-V4	SD20191018235	Q25	36	B1a
青岛市口腔医院86个血液DNA样本16SV3-V4区MiseqPE300测序分析ZWY	AWGT19101811	16S V3-V4	SD20191018236	Q25B	37	B1b
青岛市口腔医院86个血液DNA样本16SV3-V4区MiseqPE300测序分析ZWY	AWGT19101811	16S V3-V4	SD20191018237	Q25C	38	B1c
青岛市口腔医院86个血液DNA样本16SV3-V4区MiseqPE300测序分析ZWY	AWGT19101811	16S V3-V4	SD20191018238	Q28	39	B2a
青岛市口腔医院86个血液DNA样本16SV3-V4区MiseqPE300测序分析ZWY	AWGT19101811	16S V3-V4	SD20191018239	Q28B	40	B2b
青岛市口腔医院86个血液DNA样本16SV3-V4区MiseqPE300测序分析ZWY	AWGT19101811	16S V3-V4	SD20191018240	Q28C	41	B2c
青岛市口腔医院86个血液DNA样本16SV3-V4区MiseqPE300测序分析ZWY	AWGT19101811	16S V3-V4	SD20191018241	JLH	42	B3a
青岛市口腔医院86个血液DNA样本16SV3-V4区MiseqPE300测序分析ZWY	AWGT19101811	16S V3-V4	SD20191018242	Q33B	43	B3b
青岛市口腔医院86个血液DNA样本16SV3-V4区MiseqPE300测序分析ZWY	AWGT19101811	16S V3-V4	SD20191018243	Q33C	44	B3c
青岛市口腔医院86个血液DNA样本16SV3-V4区MiseqPE300测序分析ZWY	AWGT19101811	16S V3-V4	SD20191018244	Q38	45	B4a
青岛市口腔医院86个血液DNA样本16SV3-V4区MiseqPE300测序分析ZWY	AWGT19101811	16S V3-V4	SD20191018245	Q38B	46	B4b
青岛市口腔医院86个血液DNA样本16SV3-V4区MiseqPE300测序分析ZWY	AWGT19101811	16S V3-V4		NTC	NTC
青岛市口腔医院86个血液DNA样本16SV3-V4区MiseqPE300测序分析ZWY	AWGT19101811	16S V3-V4		NTC	NTC
青岛市口腔医院86个血液DNA样本16SV3-V4区MiseqPE300测序分析ZWY	AWGT19101811	16S V3-V4	SD20191018246	Q50	47	B5a
青岛市口腔医院86个血液DNA样本16SV3-V4区MiseqPE300测序分析ZWY	AWGT19101811	16S V3-V4	SD20191018247	Q50B	48	B5b
青岛市口腔医院86个血液DNA样本16SV3-V4区MiseqPE300测序分析ZWY	AWGT19101811	16S V3-V4	SD20191018248	Q50C	49	B5c
青岛市口腔医院86个血液DNA样本16SV3-V4区MiseqPE300测序分析ZWY	AWGT19101811	16S V3-V4	SD20191018249	Q23	50	C1a
青岛市口腔医院86个血液DNA样本16SV3-V4区MiseqPE300测序分析ZWY	AWGT19101811	16S V3-V4	SD20191018250	QL2	51	C1b
青岛市口腔医院86个血液DNA样本16SV3-V4区MiseqPE300测序分析ZWY	AWGT19101811	16S V3-V4	SD20191018251	Q23C	52	C1c
青岛市口腔医院86个血液DNA样本16SV3-V4区MiseqPE300测序分析ZWY	AWGT19101811	16S V3-V4	SD20191018252	Q26	53	C2a
青岛市口腔医院86个血液DNA样本16SV3-V4区MiseqPE300测序分析ZWY	AWGT19101811	16S V3-V4	SD20191018253	Q26B	54	C2b
青岛市口腔医院86个血液DNA样本16SV3-V4区MiseqPE300测序分析ZWY	AWGT19101811	16S V3-V4	SD20191018254	Q26C	55	C2c
青岛市口腔医院86个血液DNA样本16SV3-V4区MiseqPE300测序分析ZWY	AWGT19101811	16S V3-V4	SD20191018255	Q34	56	C3a
青岛市口腔医院86个血液DNA样本16SV3-V4区MiseqPE300测序分析ZWY	AWGT19101811	16S V3-V4	SD20191018256	Q34B	57	C3b
青岛市口腔医院86个血液DNA样本16SV3-V4区MiseqPE300测序分析ZWY	AWGT19101811	16S V3-V4	SD20191018257	Q34C	58	C3c
青岛市口腔医院86个血液DNA样本16SV3-V4区MiseqPE300测序分析ZWY	AWGT19101811	16S V3-V4	SD20191018258	Q35	59	C4a
青岛市口腔医院86个血液DNA样本16SV3-V4区MiseqPE300测序分析ZWY	AWGT19101811	16S V3-V4	SD20191018259	Q35B	60	C4b
青岛市口腔医院86个血液DNA样本16SV3-V4区MiseqPE300测序分析ZWY	AWGT19101811	16S V3-V4	SD20191018260	Q35C	61	C4c
青岛市口腔医院86个血液DNA样本16SV3-V4区MiseqPE300测序分析ZWY	AWGT19101811	16S V3-V4	SD20191018261	Q36	62	C5a
青岛市口腔医院86个血液DNA样本16SV3-V4区MiseqPE300测序分析ZWY	AWGT19101811	16S V3-V4	SD20191018262	Q36B	63	C5b
青岛市口腔医院86个血液DNA样本16SV3-V4区MiseqPE300测序分析ZWY	AWGT19101811	16S V3-V4	SD20191018263	Q36C	64	C5c
青岛市口腔医院86个血液DNA样本16SV3-V4区MiseqPE300测序分析ZWY	AWGT19101811	16S V3-V4	SD20191018264	Q37	65	C6a
青岛市口腔医院86个血液DNA样本16SV3-V4区MiseqPE300测序分析ZWY	AWGT19101811	16S V3-V4	SD20191018265	Q37B	66	C6b
青岛市口腔医院86个血液DNA样本16SV3-V4区MiseqPE300测序分析ZWY	AWGT19101811	16S V3-V4	SD20191018266	Q54	67	A7a
青岛市口腔医院86个血液DNA样本16SV3-V4区MiseqPE300测序分析ZWY	AWGT19101811	16S V3-V4	SD20191018267	Q54B	68	A7b
青岛市口腔医院86个血液DNA样本16SV3-V4区MiseqPE300测序分析ZWY	AWGT19101811	16S V3-V4	SD20191018268	Q54C	69	A7c
青岛市口腔医院86个血液DNA样本16SV3-V4区MiseqPE300测序分析ZWY	AWGT19101811	16S V3-V4	SD20191018269	Q58	70	C7a
青岛市口腔医院86个血液DNA样本16SV3-V4区MiseqPE300测序分析ZWY	AWGT19101811	16S V3-V4	SD20191018270	Q58B	71	C7b
青岛市口腔医院86个血液DNA样本16SV3-V4区MiseqPE300测序分析ZWY	AWGT19101811	16S V3-V4	SD20191018271	Q47	72	A8a
青岛市口腔医院86个血液DNA样本16SV3-V4区MiseqPE300测序分析ZWY	AWGT19101811	16S V3-V4	SD20191018272	QB	73	A8b
青岛市口腔医院86个血液DNA样本16SV3-V4区MiseqPE300测序分析ZWY	AWGT19101811	16S V3-V4	SD20191018273	Q24	74	B6a
青岛市口腔医院86个血液DNA样本16SV3-V4区MiseqPE300测序分析ZWY	AWGT19101811	16S V3-V4	SD20191018274	Q24B	75	B6b
青岛市口腔医院86个血液DNA样本16SV3-V4区MiseqPE300测序分析ZWY	AWGT19101811	16S V3-V4	SD20191018275	Q24C	76	B6c
青岛市口腔医院86个血液DNA样本16SV3-V4区MiseqPE300测序分析ZWY	AWGT19101811	16S V3-V4	SD20191018276	Q27	77	B7a
青岛市口腔医院86个血液DNA样本16SV3-V4区MiseqPE300测序分析ZWY	AWGT19101811	16S V3-V4	SD20191018277	Q27B	78	B7b
青岛市口腔医院86个血液DNA样本16SV3-V4区MiseqPE300测序分析ZWY	AWGT19101811	16S V3-V4	SD20191018278	Q27C	79	B7c
青岛市口腔医院86个血液DNA样本16SV3-V4区MiseqPE300测序分析ZWY	AWGT19101811	16S V3-V4	SD20191018279	Q19	80	C8a
青岛市口腔医院86个血液DNA样本16SV3-V4区MiseqPE300测序分析ZWY	AWGT19101811	16S V3-V4	SD20191018280	Q19B	81	C8b
青岛市口腔医院86个血液DNA样本16SV3-V4区MiseqPE300测序分析ZWY	AWGT19101811	16S V3-V4	SD20191018281	Q19C	82	C8c
青岛市口腔医院86个血液DNA样本16SV3-V4区MiseqPE300测序分析ZWY	AWGT19101811	16S V3-V4	SD20191018282	Q18B	83	C9b
青岛市口腔医院86个血液DNA样本16SV3-V4区MiseqPE300测序分析ZWY	AWGT19101811	16S V3-V4	SD20191018283	Q18C	84	C9c
青岛市口腔医院86个血液DNA样本16SV3-V4区MiseqPE300测序分析ZWY	AWGT19101811	16S V3-V4	SD20191018284	Q21	85	C10a
青岛市口腔医院86个血液DNA样本16SV3-V4区MiseqPE300测序分析ZWY	AWGT19101811	16S V3-V4	SD20191018285	Q21B	86	C10b
青岛市口腔医院86个血液DNA样本16SV3-V4区MiseqPE300测序分析ZWY	AWGT19101811	16S V3-V4		NTC	NTC
青岛市口腔医院86个血液DNA样本16SV3-V4区MiseqPE300测序分析ZWY	AWGT19101811	16S V3-V4		NTC	NTC
			SD20190916085	Q65		A9a
			SD20190916086	Q65B		A9b
			SD20190916087	Q18		C9a
			SD20190916088	Q39		B8a
			SD20190916089	Q39B		B8b

## Sheet: Sheet2
20191030	Zhao Xun	MEbloodPCR1910210004	Qingdao Stomatological Hospital 86 blood DNA samples16SV3-V4 region MiseqPE sequencingZWY	SD20191018202	4.53713	AWGB16SAA63831-9-3	1030-3-Y	D1	16S V3-V4	450-600	26ul		484.177	0.144797	0.453713	10	1.44797	4.53713	2019.10.31	Chenxi Zhou	2019.10.31
20191030	Zhao Xun	MEbloodPCR1910210004	Qingdao Stomatological Hospital 86 blood DNA samples16SV3-V4 region MiseqPE sequencingZWY	SD20191018203	6.43381	AWGB16SAA63832-9-4	1030-3-Y	E1	16S V3-V4	450-600	26ul		485.424	0.205825	0.643381	10	2.05825	6.43381	2019.10.31	Chenxi Zhou	2019.10.31
20191030	Zhao Xun	MEbloodPCR1910210004	Qingdao Stomatological Hospital 86 blood DNA samples16SV3-V4 region MiseqPE sequencingZWY	SD20191018204	5.79761	AWGB16SAA63833-9-5	1030-3-Y	F1	16S V3-V4	450-600	26ul		498.752	0.190537	0.579761	10	1.90537	5.79761	2019.10.31	Chenxi Zhou	2019.10.31
20191030	Zhao Xun	MEbloodPCR1910210004	Qingdao Stomatological Hospital 86 blood DNA samples16SV3-V4 region MiseqPE sequencingZWY	SD20191018205	3.25865	AWGB16SAA63834-9-6	1030-3-Y	G1	16S V3-V4	450-600	26ul		497.709	0.106841	0.325865	10	1.06841	3.25865	2019.10.31	Chenxi Zhou	2019.10.31	low concentration
20191030	Zhao Xun	MEbloodPCR1910210004	Qingdao Stomatological Hospital 86 blood DNA samples16SV3-V4 region MiseqPE sequencingZWY	SD20191018206	3.95255	AWGB16SAA63835-9-7	1030-1-Y	E4	16S V3-V4	450-600	26ul		511.432	0.132951	0.395255	10	1.32951	3.95255	2019.10.31	Chenxi Zhou	2019.10.31	low concentration
20191030	Zhao Xun	MEbloodPCR1910210004	Qingdao Stomatological Hospital 86 blood DNA samples16SV3-V4 region MiseqPE sequencingZWY	SD20191018207	10.4091	AWGB16SAA63836-9-8	1030-3-Y	H1	16S V3-V4	450-600	26ul		506.591	0.347228	1.04091	10	3.47228	10.4091	2019.10.31	Chenxi Zhou	2019.10.31
20191030	Zhao Xun	MEbloodPCR1910210004	Qingdao Stomatological Hospital 86 blood DNA samples16SV3-V4 region MiseqPE sequencingZWY	SD20191018208	2.41355	AWGB16SAA63837-9-9	1030-3-Y	A2	16S V3-V4	450-600	26ul		503.445	0.0800257	0.241355	10	0.800257	2.41355	2019.10.31	Chenxi Zhou	2019.10.31	low concentration
20191030	Zhao Xun	MEbloodPCR1910210004	Qingdao Stomatological Hospital 86 blood DNA samples16SV3-V4 region MiseqPE sequencingZWY	SD20191018209	3.25688	AWGB16SAA63838-9-10	1030-3-Y	B2	16S V3-V4	450-600	26ul		503.447	0.108035	0.325688	10	1.08035	3.25688	2019.10.31	Chenxi Zhou	2019.10.31	low concentration concentration
20191030	Zhao Xun	MEbloodPCR1910210004	Qingdao Stomatological Hospital 86 blood DNA samples16SV3-V4 region MiseqPE sequencingZWY	SD20191018210	6.91143	AWGB16SAA63839-9-11	1030-3-Y	C2	16S V3-V4	450-600	26ul		507.469	0.231095	0.691143	10	2.31095	6.91143	2019.10.31	Chenxi Zhou	2019.10.31
20191030	Zhao Xun	MEbloodPCR1910210004	Qingdao Stomatological Hospital 86 blood DNA samples16SV3-V4 region MiseqPE sequencingZWY	SD20191018211	3.88089	AWGB16SAA63840-9-12	1030-3-Y	D2	16S V3-V4	450-600	26ul		505.066	0.129105	0.388089	10	1.29105	3.88089	2019.10.31	Chenxi Zhou	2019.10.31	low concentration
20191030	Zhao Xun	MEbloodPCR1910210004	Qingdao Stomatological Hospital 86 blood DNA samples16SV3-V4 region MiseqPE sequencingZWY	SD20191018212	4.9819	AWGB16SAA63841-10-1	1030-3-Y	E2	16S V3-V4	450-600	26ul		491.645	0.161361	0.49819	10	1.61361	4.9819	2019.10.31	Chenxi Zhou	2019.10.31
20191030	Zhao Xun	MEbloodPCR1910210004	Qingdao Stomatological Hospital 86 blood DNA samples16SV3-V4 region MiseqPE sequencingZWY	SD20191018213	3.86611	AWGB16SAA63842-10-2	1030-3-Y	F2	16S V3-V4	450-600	26ul		500.074	0.127402	0.386611	10	1.27402	3.86611	2019.10.31	Chenxi Zhou	2019.10.31	low concentration)
20191030	Zhao Xun	MEbloodPCR1910210004	Qingdao Stomatological Hospital 86 blood DNA samples16SV3-V4 region MiseqPE sequencingZWY	SD20191018214	4.86782	AWGB16SAA63843-10-3	1030-3-Y	G2	16S V3-V4	450-600	26ul		504.356	0.161747	0.486782	10	1.61747	4.86782	2019.10.31	Chenxi Zhou	2019.10.31
20191030	Zhao Xun	MEbloodPCR1910210004	Qingdao Stomatological Hospital 86 blood DNA samples16SV3-V4 region MiseqPEsequencingZWY	SD20191018215	11.1769	AWGB16SAA63844-10-4	1030-3-Y	H2	16S V3-V4	450-600	26ul		496.325	0.365504	1.11769	10	3.65504	11.1769	2019.10.31	Chenxi Zhou	2019.10.31
20191030	Zhao Xun	MEbloodPCR1910210004	Qingdao Stomatological Hospital 86 blood DNA samples16SV3-V4 region MiseqPE sequencingZWY	SD20191018216	7.73442	AWGB16SAA63845-10-5	1030-3-Y	A3	16S V3-V4	450-600	26ul		506.749	0.258272	0.773442	10	2.58272	7.73442	2019.10.31	Chenxi Zhou	2019.10.31
20191030	Zhao Xun	MEbloodPCR1910210004	Qingdao Stomatological Hospital 86 blood DNA samples16SV3-V4 region MiseqPE sequencingZWY	SD20191018217	4.85892	AWGB16SAA63846-10-6	1030-1-Y	F4	16S V3-V4	450-600	26ul		510.754	0.163418	0.485892	10	1.63418	4.85892	2019.10.31	Chenxi Zhou	2019.10.31
20191030	Zhao Xun	MEbloodPCR1910210004	Qingdao Stomatological Hospital 86 blood DNA samples16SV3-V4 region MiseqPE sequencingZWY	SD20191018218	5.06392	AWGB16SAA63847-10-7	1030-3-Y	B3	16S V3-V4	450-600	26ul		510.436	0.17022	0.506392	10	1.7022	5.06392	2019.10.31	Chenxi Zhou	2019.10.31
20191030	Zhao Xun	MEbloodPCR1910210004	Qingdao Stomatological Hospital 86 blood DNA samples16SV3-V4 region MiseqPEsequencingZWY	SD20191018219	4.8808	AWGB16SAA63848-10-8	1030-3-Y	C3	16S V3-V4	450-600	26ul		500.786	0.160815	0.48808	10	1.60815	4.8808	2019.10.31	Chenxi Zhou	2019.10.31
20191030	Zhao Xun	MEbloodPCR1910210004	Qingdao Stomatological Hospital 86 blood DNA samples16SV3-V4 region MiseqPE sequencingZWY	SD20191018220	1.19374	AWGB16SAA63849-10-9	1030-3-Y	D3	16S V3-V4	450-600	26ul		487.371	0.0383443	0.119374	10	0.383443	1.19374	2019.10.31	Chenxi Zhou	2019.10.31	low concentration)
20191030	Zhao Xun	MEbloodPCR1910210004	Qingdao Stomatological Hospital 86 blood DNA samples16SV3-V4 region MiseqPE sequencingZWY	SD20191018221	5.0638	AWGB16SAA63850-10-10	1030-3-Y	E3	16S V3-V4	450-600	26ul		488.339	0.162835	0.50638	10	1.62835	5.0638	2019.10.31	Chenxi Zhou	2019.10.31
20191030	Zhao Xun	MEbloodPCR1910210004	Qingdao Stomatological Hospital 86 blood DNA samples16SV3-V4 region MiseqPE sequencingZWY	SD20191018222	1.93609	AWGB16SAA63851-10-11	1030-3-Y	F3	16S V3-V4	450-600	26ul		495.77	0.063201	0.193609	10	0.63201	1.93609	2019.10.31	Chenxi Zhou	2019.10.31	low concentration
20191030	Zhao Xun	MEbloodPCR1910210004	Qingdao Stomatological Hospital 86 blood DNA samples16SV3-V4 region MiseqPE sequencingZWY	SD20191018223	5.72018	AWGB16SAA63852-10-12	1030-3-Y	G3	16S V3-V4	450-600	26ul		498.127	0.187795	0.572018	10	1.87795	5.72018	2019.10.31	Chenxi Zhou	2019.10.31
20191030	Zhao Xun	MEbloodPCR1910210004	Qingdao Stomatological Hospital 86 blood DNA samples16SV3-V4 region MiseqPE sequencingZWY	SD20191018224	3.41545	AWGB16SAA63853-11-1	1030-3-Y	H3	16S V3-V4	450-600	26ul		502.929	0.113181	0.341545	10	1.13181	3.41545	2019.10.31	Chenxi Zhou	2019.10.31	low concetration
20191030	Zhao Xun	MEbloodPCR1910210004	Qingdao Stomatological Hospital 86 blood DNA samples16SV3-V4 region MiseqPE sequencingZWY	SD20191018225	4.25155	AWGB16SAA63854-11-2	1030-3-Y	A4	16S V3-V4	450-600	26ul		495.448	0.138829	0.425155	10	1.38829	4.25155	2019.10.31	Chenxi Zhou	2019.10.31
20191030	Zhao Xun	MEbloodPCR1910210004	Qingdao Stomatological Hospital 86 blood DNA samples16SV3-V4 region MiseqPE sequencingZWY	SD20191018226	3.79947	AWGB16SAA63855-11-3	1030-3-Y	B4	16S V3-V4	450-600	26ul		481.587	0.120666	0.379947	10	1.20666	3.79947	2019.10.31	Chenxi Zhou	2019.10.31	low concentration
20191030	Zhao Xun	MEbloodPCR1910210004	Qingdao Stomatological Hospital 86 blood DNA samples16SV3-V4 region MiseqPE sequencingZWY	SD20191018227	2.88522	AWGB16SAA63856-11-4	1030-3-Y	C4	16S V3-V4	450-600	26ul		494.663	0.094062	0.288522	10	0.94062	2.88522	2019.10.31	Chenxi Zhou	2019.10.31	low concentration
20191030	Zhao Xun	MEbloodPCR1910210004	Qingdao Stomatological Hospital 86 blood DNA samples16SV3-V4 region MiseqPE sequencingZWY	SD20191018228	7.98535	AWGB16SAA63857-11-5	1030-3-Y	D4	16S V3-V4	450-600	26ul		490.72	0.258135	0.798535	10	2.58135	7.98535	2019.10.31	Chenxi Zhou	2019.10.31
20191030	Zhao Xun	MEbloodPCR1910210004	Qingdao Stomatological Hospital 86 blood DNA samples16SV3-V4 region MiseqPE sequencingZWY	SD20191018229	3.0548	AWGB16SAA63858-11-6	1030-3-Y	E4	16S V3-V4	450-600	26ul		478.448	0.096356	0.30548	10	0.96356	3.0548	2019.10.31	Chenxi Zhou	2019.10.31	low concetration
20191030	Zhao Xun	MEbloodPCR1910210004	Qingdao Stomatological Hospital 86 blood DNA samples16SV3-V4 region MiseqPE sequencingZWY	SD20191018230	1.53488	AWGB16SAA63859-11-7	1030-3-Y	F4	16S V3-V4	450-600	26ul		494.187	0.0499397	0.153488	10	0.499397	1.53488	2019.10.31	Chenxi Zhou	2019.10.31	low concentration
20191030	Zhao Xun	MEbloodPCR1910210004	Qingdao Stomatological Hospital 86 blood DNA samples16SV3-V4 region MiseqPE sequencingZWY	SD20191018232	4.43613	AWGB16SAA63861-11-9	1030-3-Y	H4	16S V3-V4	450-600	26ul		470.583	0.137664	0.443613	10	1.37664	4.43613	2019.10.31	Chenxi Zhou	2019.10.31
20191030	Zhao Xun	MEbloodPCR1910210004	Qingdao Stomatological Hospital 86 blood DNA samples16SV3-V4 region MiseqPE sequencingZWY	SD20191018234	6.75047	AWGB16SAA63863-11-11	1030-3-Y	A5	16S V3-V4	450-600	26ul		471.235	0.209688	0.675047	10	2.09688	6.75047	2019.10.31	Chenxi Zhou	2019.10.31
20191030	Zhao Xun	MEbloodPCR1910210004	Qingdao Stomatological Hospital 86 blood DNA samples16SV3-V4 region MiseqPE sequencingZWY	SD20191018235	2.00676	AWGB16SAA63864-11-12	1030-3-Y	B5	16S V3-V4	450-600	26ul		470.516	0.062263	0.200676	10	0.62263	2.00676	2019.10.31	Chenxi Zhou	2019.10.31	low concetntration
20191030	Zhao Xun	MEbloodPCR1910210004	Qingdao Stomatological Hospital 86 blood DNA samples16SV3-V4 region MiseqPE sequencingZWY	SD20191018236	5.2552	AWGB16SAA63865-12-1	1030-3-Y	C5	16S V3-V4	450-600	26ul		475.595	0.164793	0.52552	10	1.64793	5.2552	2019.10.31	Chenxi Zhou	2019.10.31
20191030	Zhao Xun	MEbloodPCR1910210004	Qingdao Stomatological Hospital 86 blood DNA samples16SV3-V4 region MiseqPE sequencingZWY	SD20191018237	4.13815	AWGB16SAA63866-12-2	1030-3-Y	D5	16S V3-V4	450-600	26ul		490.635	0.133822	0.413815	10	1.33822	4.13815	2019.10.31	Chenxi Zhou	2019.10.31
20191030	Zhao Xun	MEbloodPCR1910210004	Qingdao Stomatological Hospital 86 blood DNA samples16SV3-V4 region MiseqPE sequencingZWY	SD20191018238	8.32359	AWGB16SAA63867-12-3	1030-3-Y	E5	16S V3-V4	450-600	26ul		483.718	0.265426	0.832359	10	2.65426	8.32359	2019.10.31	Chenxi Zhou	2019.10.31
20191030	Zhao Xun	MEbloodPCR1910210004	Qingdao Stomatological Hospital 86 blood DNA samples16SV3-V4 region MiseqPE sequencingZWY	SD20191018239	9.75862	AWGB16SAA63868-12-4	1030-3-Y	F5	16S V3-V4	450-600	26ul		480.028	0.308775	0.975862	10	3.08775	9.75862	2019.10.31	Chenxi Zhou	2019.10.31
20191030	Zhao Xun	MEbloodPCR1910210004	Qingdao Stomatological Hospital 86 blood DNA samples16SV3-V4 region MiseqPEsequencingZWY	SD20191018240	1.89432	AWGB16SAA63869-12-5	1030-3-Y	G5	16S V3-V4	450-600	26ul		500.881	0.0625338	0.189432	10	0.625338	1.89432	2019.10.31	Chenxi Zhou	2019.10.31	low concentration
20191030	Zhao Xun	MEbloodPCR1910210004	Qingdao Stomatological Hospital 86 blood DNA samples16SV3-V4 region MiseqPE sequencingZWY	SD20191018241	2.89406	AWGB16SAA63870-12-6	1030-3-Y	H5	16S V3-V4	450-600	26ul		477.284	0.0910803	0.289406	10	0.910803	2.89406	2019.10.31	Chenxi Zhou	2019.10.31	low concentration
20191030	Zhao Xun	MEbloodPCR1910210004	Qingdao Stomatological Hospital 86 blood DNA samples16SV3-V4 region MiseqPE sequencingZWY	SD20191018242	6.69083	AWGB16SAA63871-12-7	1030-1-Y	G4	16S V3-V4	450-600	26ul		486.445	0.214572	0.669083	10	2.14572	6.69083	2019.10.31	Chenxi Zhou	2019.10.31
20191030	Zhao Xun	MEbloodPCR1910210004	Qingdao Stomatological Hospital 86 blood DNA samples16SV3-V4 region MiseqPE sequencingZWY	SD20191018243	3.73643	AWGB16SAA63872-12-8	1030-1-Y	H4	16S V3-V4	450-600	26ul		513.057	0.1262	0.373643	10	1.262	3.73643	2019.10.31	Chenxi Zhou	2019.10.31	low concentration
20191030	Zhao Xun	MEbloodPCR1910210004	Qingdao Stomatological Hospital 86 blood DNA samples16SV3-V4 region MiseqPE sequencingZWY	SD20191018244	1.78596	AWGB16SAA63873-12-9	1030-3-Y	A6	16S V3-V4	450-600	26ul		485.362	0.0571182	0.178596	10	0.571182	1.78596	2019.10.31	Chenxi Zhou	2019.10.31	low concentration
20191030	Zhao Xun	MEbloodPCR1910210004	Qingdao Stomatological Hospital 86 blood DNA samples16SV3-V4 region MiseqPE sequencingZWY	SD20191018245	1.51685	AWGB16SAA63874-12-10	1030-3-Y	B6	16S V3-V4	450-600	26ul		493.376	0.0492842	0.151685	10	0.492842	1.51685	2019.10.31	Chenxi Zhou	2019.10.31	low concentration
20191030	Zhao Xun	MEbloodPCR1910210004	Qingdao Stomatological Hospital 86 blood DNA samples16SV3-V4 region MiseqPE sequencingZWY	SD20191018246	0.970073	AWGB16SAA63875-12-11	1030-3-Y	C6	16S V3-V4	450-600	26ul		504.015	0.0322324	0.0970073	10	0.322324	0.970073	2019.10.31	Chenxi Zhou	2019.10.31	low concentration
20191030	Zhao Xun	MEbloodPCR1910210004	Qingdao Stomatological Hospital 86 blood DNA samples16SV3-V4 region MiseqPE sequencingZWY	SD20191018247	2.07825	AWGB16SAA63876-13-1	1030-3-Y	D6	16S V3-V4	450-600	26ul		496.155	0.0679062	0.207825	10	0.679062	2.07825	2019.10.31	Chenxi Zhou	2019.10.31	low concentration
20191030	Zhao Xun	MEbloodPCR1910210004	Qingdao Stomatological Hospital 86 blood DNA samples16SV3-V4 region MiseqPE sequencingZWY	SD20191018248	11.5074	AWGB16SAA63877-13-2	1030-3-Y	E6	16S V3-V4	450-600	26ul		501.436	0.380398	1.15074	10	3.80398	11.5074	2019.10.31	Chenxi Zhou	2019.10.31
20191030	Zhao Xun	MEbloodPCR1910210004	Qingdao Stomatological Hospital 86 blood DNA samples16SV3-V4 region MiseqPE sequencingZWY	SD20191018249	5.77102	AWGB16SAA63878-13-3	1030-3-Y	F6	16S V3-V4	450-600	26ul		490.238	0.186282	0.577102	10	1.86282	5.77102	2019.10.31	Chenxi Zhou	2019.10.31
20191030	Zhao Xun	MEbloodPCR1910210004	Qingdao Stomatological Hospital 86 blood DNA samples16SV3-V4 region MiseqPE sequencingZWY	SD20191018250	4.90601	AWGB16SAA63879-13-4	1030-3-Y	G6	16S V3-V4	450-600	26ul		485.484	0.156943	0.490601	10	1.56943	4.90601	2019.10.31	Chenxi Zhou	2019.10.31
20191030	Zhao Xun	MEbloodPCR1910210004	Qingdao Stomatological Hospital 86 blood DNA samples16SV3-V4 region MiseqPE sequencingZWY	SD20191018251	0.350498	AWGB16SAA63880-13-5	1030-3-Y	H6	16S V3-V4	450-600	26ul		507.879	0.011708	0.0350498	10	0.11708	0.350498	2019.10.31	Chenxi Zhou	2019.10.31	low concentreation
20191030	Zhao Xun	MEbloodPCR1910210004	Qingdao Stomatological Hospital 86 blood DNA samples16SV3-V4 region MiseqPE sequencingZWY	SD20191018252	34.4317	AWGB16SAA63881-13-6	1030-1-Y	A5	16S V3-V4	450-600	26ul		538.958	1.22229	3.44317	10	12.2229	34.4317	2019.10.31	Chenxi Zhou	2019.10.31
20191030	Zhao Xun	MEbloodPCR1910210004	Qingdao Stomatological Hospital 86 blood DNA samples16SV3-V4 region MiseqPE sequencingZWY	SD20191018253	1.86801	AWGB16SAA63882-13-7	1030-3-Y	A7	16S V3-V4	450-600	26ul		483.996	0.0595994	0.186801	10	0.595994	1.86801	2019.10.31	Chenxi Zhou	2019.10.31	low concentraition
20191030	Zhao Xun	MEbloodPCR1910210004	Qingdao Stomatological Hospital 86 blood DNA samples16SV3-V4 region MiseqPE sequencingZWY	SD20191018254	5.64128	AWGB16SAA63883-13-8	1030-1-Y	B5	16S V3-V4	450-600	26ul		526.565	0.195779	0.564128	10	1.95779	5.64128	2019.10.31	Chenxi Zhou	2019.10.31
20191030	Zhao Xun	MEbloodPCR1910210004	Qingdao Stomatological Hospital 86 blood DNA samples16SV3-V4 region MiseqPE sequencingZWY	SD20191018255	5.00593	AWGB16SAA63884-13-9	1030-1-Y	C5	16S V3-V4	450-600	26ul		491.517	0.161658	0.500593	10	1.61658	5.00593	2019.10.31	Chenxi Zhou	2019.10.31
20191030	Zhao Xun	MEbloodPCR1910210004	Qingdao Stomatological Hospital 86 blood DNA samples16SV3-V4 region MiseqPE sequencingZWY	SD20191018256	3.78905	AWGB16SAA63885-13-10	1030-3-Y	B7	16S V3-V4	450-600	26ul		503.032	0.12558	0.378905	10	1.2558	3.78905	2019.10.31	Chenxi Zhou	2019.10.31	low concentration
20191030	Zhao Xun	MEbloodPCR1910210004	Qingdao Stomatological Hospital 86 blood DNA samples16SV3-V4 region MiseqPE sequencingZWY	SD20191018257	4.9319	AWGB16SAA63886-13-11	1030-3-Y	C7	16S V3-V4	450-600	26ul		498.458	0.161951	0.49319	10	1.61951	4.9319	2019.10.31	Chenxi Zhou	2019.10.31
20191030	Zhao Xun	MEbloodPCR1910210004	Qingdao Stomatological Hospital 86 blood DNA samples16SV3-V4 region MiseqPE sequencingZWY	SD20191018258	2.88966	AWGB16SAA63887-13-12	1030-3-Y	D7	16S V3-V4	450-600	26ul		509.895	0.0971266	0.288966	10	0.971266	2.88966	2019.10.31	Chenxi Zhou	2019.10.31	low concentration
20191030	Zhao Xun	MEbloodPCR1910210004	Qingdao Stomatological Hospital 86 blood DNA samples16SV3-V4 region MiseqPE sequencingZWY	SD20191018259	2.90818	AWGB16SAA63888-14-1	1030-3-Y	E7	16S V3-V4	450-600	26ul		508.126	0.0973274	0.290818	10	0.973274	2.90818	2019.10.31	Chenxi Zhou	2019.10.31	low concentration
20191030	Zhao Xun	MEbloodPCR1910210004	Qingdao Stomatological Hospital 86 blood DNA samples16SV3-V4 region MiseqPE sequencingZWY	SD20191018260	3.91238	AWGB16SAA63889-14-2	1030-1-Y	D5	16S V3-V4	450-600	26ul		513.516	0.132305	0.391238	10	1.32305	3.91238	2019.10.31	Chenxi Zhou	2019.10.31	low concentration
20191030	Zhao Xun	MEbloodPCR1910210004	Qingdao Stomatological Hospital 86 blood DNA samples16SV3-V4 region MiseqPE sequencingZWY	SD20191018261	8.80392	AWGB16SAA63890-14-3	1030-1-Y	E5	16S V3-V4	450-600	26ul		529.427	0.307172	0.880392	10	3.07172	8.80392	2019.10.31	Chenxi Zhou	2019.10.31
20191030	Zhao Xun	MEbloodPCR1910210004	Qingdao Stomatological Hospital 86 blood DNA samples16SV3-V4 region MiseqPE sequencingZWY	SD20191018262	7.18991	AWGB16SAA63891-14-4	1030-3-Y	F7	16S V3-V4	450-600	26ul		501.882	0.237715	0.718991	10	2.37715	7.18991	2019.10.31	Chenxi Zhou	2019.10.31
20191030	Zhao Xun	MEbloodPCR1910210004	Qingdao Stomatological Hospital 86 blood DNA samples16SV3-V4 region MiseqPEsequencingZWY	SD20191018263	7.86452	AWGB16SAA63892-14-5	1030-3-Y	G7	16S V3-V4	450-600	26ul		500.204	0.259192	0.786452	10	2.59192	7.86452	2019.10.31	Chenxi Zhou	2019.10.31
20191030	Zhao Xun	MEbloodPCR1910210004	Qingdao Stomatological Hospital 86 blood DNA samples16SV3-V4 region MiseqPE sequencingZWY	SD20191018265	7.91749	AWGB16SAA63894-14-7	1030-3-Y	H7	16S V3-V4	450-600	26ul		501.611	0.261759	0.791749	10	2.61759	7.91749	2019.10.31	Chenxi Zhou	2019.10.31
20191030	Zhao Xun	MEbloodPCR1910210004	Qingdao Stomatological Hospital 86 blood DNA samples16SV3-V4 region MiseqPE sequencingZWY	SD20191018266	5.69683	AWGB16SAA63895-14-8	1030-3-Y	A8	16S V3-V4	450-600	26ul		494.199	0.18544	0.569683	10	1.8544	5.69683	2019.10.31	Chenxi Zhou	2019.10.31
20191030	Zhao Xun	MEbloodPCR1910210004	Qingdao Stomatological Hospital 86 blood DNA samples16SV3-V4 region MiseqPE sequencingZWY	SD20191018267	6.81977	AWGB16SAA63896-14-9	1030-3-Y	B8	16S V3-V4	450-600	26ul		488.732	0.219546	0.681977	10	2.19546	6.81977	2019.10.31	Chenxi Zhou	2019.10.31
20191030	Zhao Xun	MEbloodPCR1910210004	Qingdao Stomatological Hospital 86 blood DNA samples16SV3-V4 region MiseqPE sequencingZWY	SD20191018268	4.95726	AWGB16SAA63897-14-10	1030-1-Y	F5	16S V3-V4	450-600	26ul		515.531	0.168351	0.495726	10	1.68351	4.95726	2019.10.31	Chenxi Zhou	2019.10.31
20191030	Zhao Xun	MEbloodPCR1910210004	Qingdao Stomatological Hospital 86 blood DNA samples16SV3-V4 region MiseqPE sequencingZWY	SD20191018269	2.55953	AWGB16SAA63898-14-11	1030-1-Y	G5	16S V3-V4	450-600	26ul		518.968	0.0875083	0.255953	10	0.875083	2.55953	2019.10.31	Chenxi Zhou	2019.10.31	low contcentration
20191030	Zhao Xun	MEbloodPCR1910210004	Qingdao Stomatological Hospital 86 blood DNA samples16SV3-V4 region MiseqPE sequencingZWY	SD20191018270	4.33526	AWGB16SAA63899-14-12	1030-1-Y	H5	16S V3-V4	450-600	26ul		515.231	0.147045	0.433526	10	1.47045	4.33526	2019.10.31	Chenxi Zhou	2019.10.31
20191030	Zhao Xun	MEbloodPCR1910210004	Qingdao Stomatological Hospital 86 blood DNA samples16SV3-V4 region MiseqPE sequencingZWY	SD20191018272	0.381141	AWGB16SAA63901-15-2	1030-3-Y	C8	16S V3-V4	450-600	26ul		474.669	0.0119086	0.0381141	10	0.119086	0.381141	2019.10.31	Chenxi Zhou	2019.10.31	low concentration
20191030	Zhao Xun	MEbloodPCR1910210004	Qingdao Stomatological Hospital 86 blood DNA samples16SV3-V4 region MiseqPE sequencingZWY	SD20191018273	0.922463	AWGB16SAA63902-15-3	1030-3-Y	D8	16S V3-V4	450-600	26ul		519.15	0.0314758	0.0922463	10	0.314758	0.922463	2019.10.31	Chenxi Zhou	2019.10.31	low concentration
20191030	Zhao Xun	MEbloodPCR1910210004	Qingdao Stomatological Hospital 86 blood DNA samples16SV3-V4 region MiseqPE sequencingZWY	SD20191018276	9.1188	AWGB16SAA63905-15-6	1030-1-Y	A6	16S V3-V4	450-600	26ul		497.399	0.298804	0.91188	10	2.98804	9.1188	2019.10.31	Chenxi Zhou	2019.10.31
20191030	Zhao Xun	MEbloodPCR1910210004	Qingdao Stomatological Hospital 86 blood DNA samples16SV3-V4 region MiseqPE sequencingZWY	SD20191018277	6.10275	AWGB16SAA63906-15-7	1030-1-Y	B6	16S V3-V4	450-600	26ul		490.608	0.197464	0.610275	10	1.97464	6.10275	2019.10.31	Chenxi Zhou	2019.10.31
20191030	Zhao Xun	MEbloodPCR1910210004	Qingdao Stomatological Hospital 86 blood DNA samples16SV3-V4 region MiseqPE sequencingZWY	SD20191018278	2.61953	AWGB16SAA63907-15-8	1030-3-Y	E8	16S V3-V4	450-600	26ul		496.437	0.0856709	0.261953	10	0.856709	2.61953	2019.10.31	Chenxi Zhou	2019.10.31	low concentration
20191030	Zhao Xun	MEbloodPCR1910210004	Qingdao Stomatological Hospital 86 blood DNA samples16SV3-V4 region MiseqPE sequencingZWY	SD20191018279	11.126	AWGB16SAA63908-15-9	1030-3-Y	F8	16S V3-V4	450-600	26ul		487.596	0.35762	1.1126	10	3.5762	11.126	2019.10.31	Chenxi Zhou	2019.10.31
20191030	Zhao Xun	MEbloodPCR1910210004	Qingdao Stomatological Hospital 86 blood DNA samples16SV3-V4 region MiseqPE sequencingZWY	SD20191018280	24.1337	AWGB16SAA63909-15-10	1030-1-Y	C6	16S V3-V4	450-600	26ul		492.059	0.782852	2.41337	10	7.82852	24.1337	2019.10.31	Chenxi Zhou	2019.10.31
20191030	Zhao Xun	MEbloodPCR1910210004	Qingdao Stomatological Hospital 86 blood DNA samples16SV3-V4 region MiseqPEsequencingZWY	SD20191018281	1.83549	AWGB16SAA63910-15-11	1030-3-Y	G8	16S V3-V4	450-600	26ul		487.255	0.0589675	0.183549	10	0.589675	1.83549	2019.10.31	Chenxi Zhou	2019.10.31	low concentration
20191030	Zhao Xun	MEbloodPCR1910210004	Qingdao Stomatological Hospital 86 blood DNA samples16SV3-V4 region MiseqPEsequencingZWY	SD20191018282	1.98403	AWGB16SAA63911-15-12	1030-3-Y	H8	16S V3-V4	450-600	26ul		484.341	0.06336	0.198403	10	0.6336	1.98403	2019.10.31	Chenxi Zhou	2019.10.31	low concentration
20191030	Zhao Xun	MEbloodPCR1910210004	Qingdao Stomatological Hospital 86 blood DNA samples16SV3-V4 region MiseqPE sequencingZWY	SD20191018283	3.26192	AWGB16SAA63912-16-1	1030-3-Y	A9	16S V3-V4	450-600	26ul		485.951	0.104439	0.326192	10	1.04439	3.26192	2019.10.31	Chenxi Zhou	2019.10.31	low concentration
20191030	Zhao Xun	MEbloodPCR1910210004	Qingdao Stomatological Hospital 86 blood DNA samples16SV3-V4 region MiseqPE sequencingZWY	SD20191018284	6.45884	AWGB16SAA63913-16-2	1030-1-Y	D6	16S V3-V4	450-600	26ul		520.403	0.22155	0.645884	10	2.2155	6.45884	2019.10.31	Chenxi Zhou	2019.10.31
20191030	Zhao Xun	MEbloodPCR1910210004	Qingdao Stomatological Hospital 86 blood DNA samples16SV3-V4 region MiseqPEsequencingZWY	SD20191018285	0.598673	AWGB16SAA63914-16-3	1030-3-Y	B9	16S V3-V4	450-600	26ul		488.741	0.0192877	0.0598673	10	0.192877	0.598673	2019.10.31	Chenxi Zhou	2019.10.31	low concentration
20191030	Zhao Xun	MEbloodPCR1910210004	Qingdao Stomatological Hospital 86 blood DNA samples16SV3-V4 region MiseqPE sequencingZWY					G4	16S V3-V4	450-600	26ul
